# Supplementary material for: Ln3I5(S2N2)(S2)(THF)10 – a new type of molecular compounds
Source: Royal Society of Chemistry journal article supplement (doi:10.1039/c5dt04742k), 2016-01-01
Supplement: c5dt04742k1.pdf [file c5dt04742k1.pdf]

## Supplementary information

### $\text{Ln}_3\text{I}_5(\text{S}_2\text{N}_2)(\text{S}_2)(\text{THF})_{10}$ – a new type of molecular compounds

A.A. Fagin<sup>a</sup>, G.K. Fukin<sup>a</sup>, A.V. Cherkasov<sup>a</sup>, A.F. Shestakov<sup>b</sup>, A.P. Pushkarev<sup>a</sup>, T.V. Balashova<sup>a</sup>,  
A.A. Maleev<sup>a</sup> and M.N. Bochkarev<sup>a\*</sup>

<sup>a</sup> G. A. Razuvaev Institute of Organometallic Chemistry of Russian Academy of Sciences, 603950 Tropinina 49,  
Nizhny Novgorod, Russian Federation. \*e-mail: mboch@iomc.ras.ru

<sup>b</sup> Institute of Problems of Chemical Physics of Russian Academy of Sciences, Academician Semenov avenue 1,  
142432 Chernogolovka, Russian Federation.

#### Supporting Information Contents

|                                                        |   |
|--------------------------------------------------------|---|
| X-ray structure characterization                       | 1 |
| Computed molecular structures and calculations details | 6 |
| Absorption and luminescence spectra                    | 7 |
| References                                             | 8 |

#### X-ray structure characterization

The unit cell in **1** and **2** (Fig. 1, S1) (unlike complex **3** (Fig. S2)) contains two crystallographically independent molecules. The geometrical parameters of the independent molecules close to each other except the Nd(2)-N(2) distances which is 2.523(7) Å in one of the independent molecules of complex **1** but 2.460(8) Å in the other molecule. The geometrical parameters of  $\text{S}_2\text{N}_2$  and  $\text{S}_2$  ligands in **1-3** (Table S1) are close to literature data<sup>[1-5]</sup> and reflect their dianion nature. The  $\text{S}_2\text{N}_2$  ligand in **1-3** shows a wide spectrum of coordination possibilities. The M(1) atoms are coordinated bidentately by the single S(1)-N(1) bond of  $\text{S}_2\text{N}_2$  ligand. Towards the M(2) and M(3) atoms the  $\text{S}_2\text{N}_2$  ligand acts as chelate and bridge ones respectively. From this viewpoint the  $\text{S}_2\text{N}_2$  ligand is a central fragment in the molecules of complexes **1-3**. In spite of difference in coordination environment of Ln atoms in **1-3** the Ln(1,2,3)-N(1,2) distances vary in narrow limit of values in all the cases.

**Table S1.** Selected bond lengths (Å) in the molecules  $\text{Ln}_3\text{I}_5(\text{S}_2\text{N}_2)(\text{S}_2)(\text{solv.})_{10}$

| Bond      | Compound  |           |          |
|-----------|-----------|-----------|----------|
|           | <b>1</b>  | <b>2</b>  | <b>3</b> |
| M(1)-I(1) | 3.1045(9) | 3.1086(8) | 3.140(1) |
| M(1)-I(2) | 3.1106(8) | 3.1178(8) | 3.135(1) |
| M(1)-S(1) | 2.856(2)  | 2.861(3)  | 2.889(3) |
| M(1)-N(1) | 2.488(8)  | 2.458(9)  | 2.453(9) |

|           |           |           |          |
|-----------|-----------|-----------|----------|
| M(2)-I(3) | 3.2067(9) | 3.2142(9) | 3.221(1) |
| M(2)-I(4) | 3.1812(9) | 3.1865(9) | 3.197(1) |
| M(2)-S(1) | 2.890(2)  | 2.896(3)  | 2.943(3) |
| M(2)-N(2) | 2.460(8)  | 2.493(8)  | 2.507(9) |
| M(2)-S(3) | 2.839(3)  | 2.805(3)  | 2.826(3) |
| M(2)-S(4) | 2.798(3)  | 2.834(2)  | 2.854(3) |
| M(3)-I(5) | 3.1524(8) | 3.1576(8) | 3.174(1) |
| M(3)-N(2) | 2.469(8)  | 2.482(8)  | 2.499(9) |
| M(3)-S(3) | 2.771(2)  | 2.795(2)  | 2.822(3) |
| M(3)-S(4) | 2.794(2)  | 2.787(2)  | 2.797(3) |
| S(1)-N(1) | 1.684(8)  | 1.706(8)  | 1.699(9) |
| N(1)-S(2) | 1.573(8)  | 1.561(9)  | 1.591(9) |
| S(2)-N(2) | 1.531(8)  | 1.500(9)  | 1.52(1)  |
| S(3)-S(4) | 2.084(3)  | 2.091(4)  | 2.097(4) |

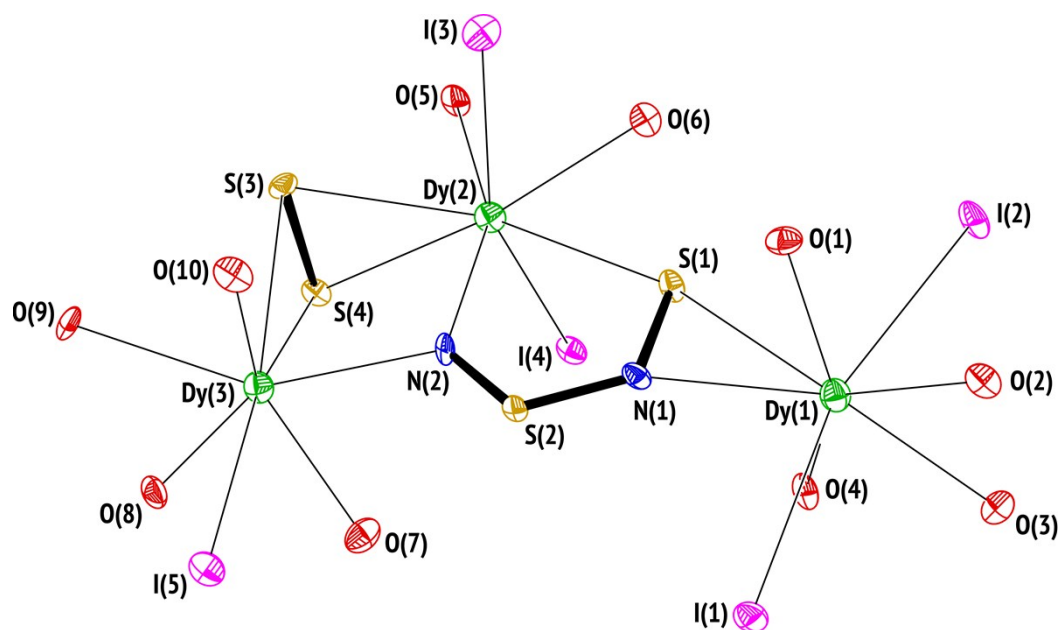

**Fig. S1** Molecular structure of  $\text{Dy}_3\text{I}_5(\text{S}_2\text{N}_2)(\text{S}_2)(\text{THF})_{10}$  (**2**). Carbon and hydrogen atoms of THF are omitted for clarity.

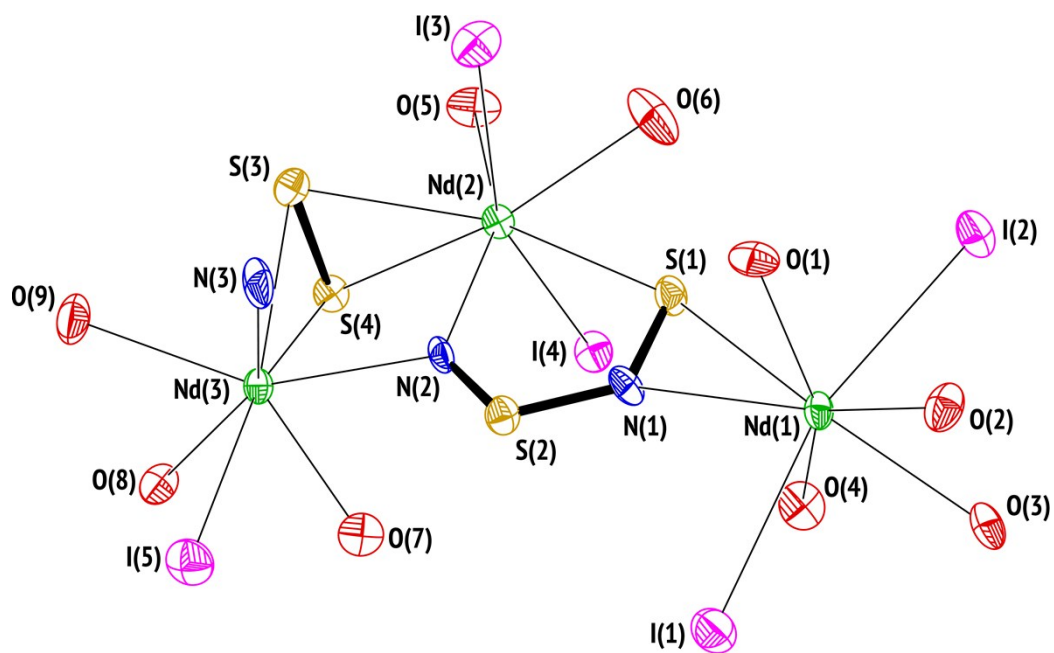

**Fig. S2** Molecular structure of  $\text{Nd}_3\text{I}_5(\text{S}_2\text{N}_2)(\text{S}_2)(\text{THF})_9(i\text{-PrNH}_2)$  (**3**). Carbon and hydrogen atoms of *i*-PrNH<sub>2</sub> and THF ligands are omitted for clarity.

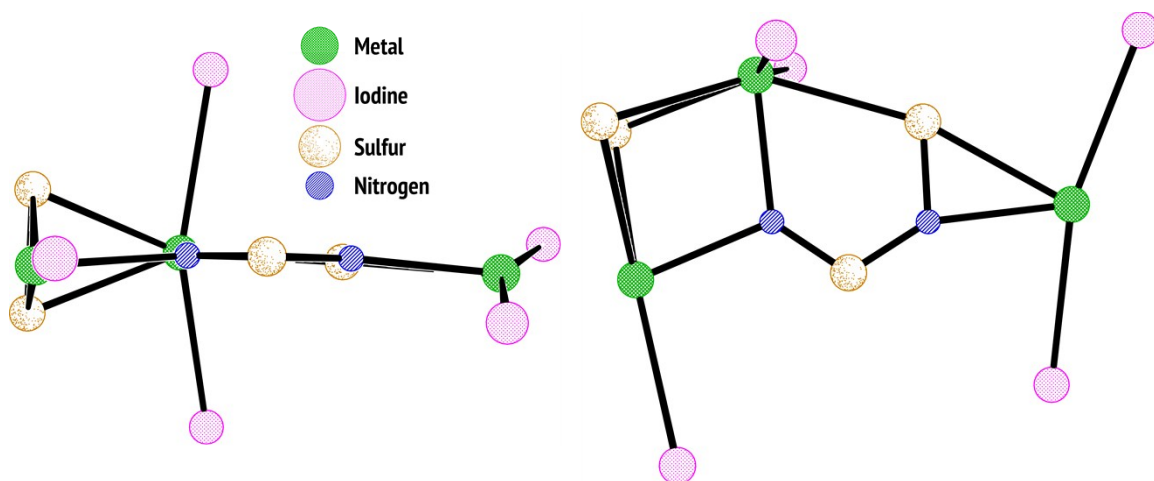

**Fig. S3** View of inorganic framework of  $\text{Nd}_3\text{I}_5(\text{S}_2\text{N}_2)(\text{S}_2)(\text{THF})_{10}$  (**1**) molecule along the Nd(1)Nd(2)Nd(3) plane (left) and the I(5)Nd(3)S(3)S(4) plane (right).

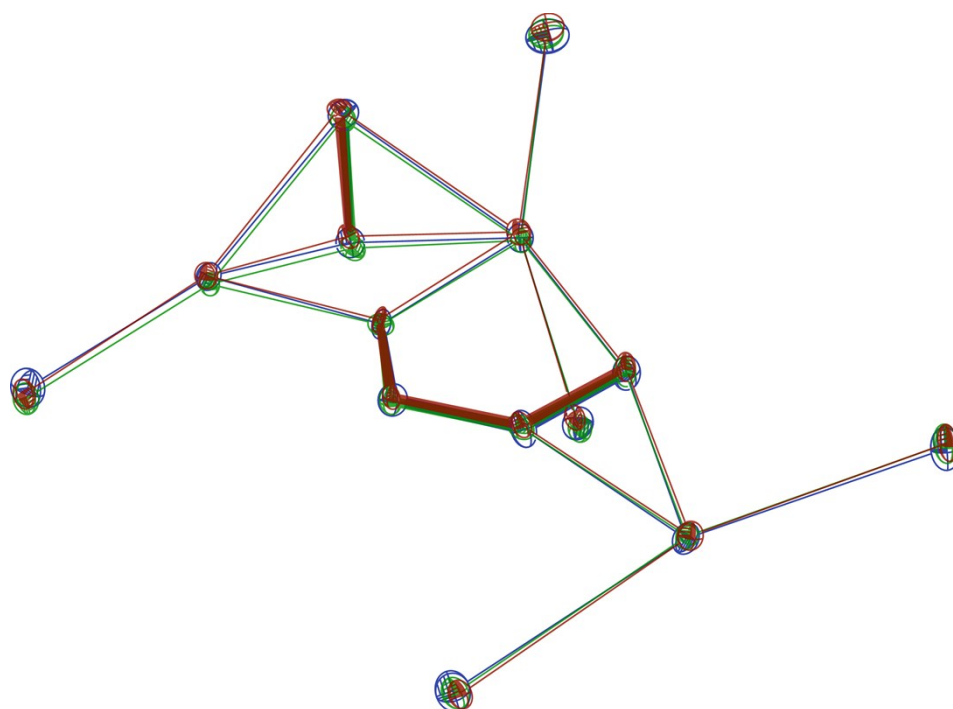

**Fig. S4** Aligned inorganic frameworks of the complexes **1** (green), **2** (red) and **3** (blue).

The X-Ray data for **1-3** were collected on *Bruker D8 Quest* (**1**, **2**) and *Agilent Xcalibur E* (**3**) diffractometers (graphite-monochromated,  $MoK_{\alpha}$  radiation,  $\omega$ -scans technique,  $\lambda = 0.71073 \text{ \AA}$ ,  $T = 100(2) \text{ K}$ ). The structures were solved by direct methods and were refined on  $F^2$  using *SHELX / SHELXTL*<sup>[6,7]</sup> and *CrysAlis Pro*<sup>[8]</sup> packages. All non-hydrogen atoms were found from Fourier syntheses of electron density and were refined anisotropically. The unit cell in **1** and **2** contains two crystallographically independent molecules. Displacement parameters of most equivalent atoms of independent molecules were restrained with *EADP* instructions. All hydrogen atoms were placed in calculated positions and were refined in the riding model with  $U_{iso}(H) = 1.2 U_{eq}$  of their parent atoms. Pseudo merohedral twinning was found in **1** and **2** using *PLATON / TwinRotMat*<sup>[9]</sup>. A batch scaling factor was introduced to describe the twin volume fractions in **1-3**, resulting in a 0.503 / 0.497 ratio for the volume of domains in **1**, 0.434 / 0.363 / 0.115 / 0.088 for the volume of domains in **2** (including racemic twinning) and 0.982 / 0.018 ratio for the volume of domains in **3**. *SADABS*<sup>[10]</sup> and *ABSPACK*<sup>[8]</sup> were used to perform area-detector scaling and absorption corrections. CCDC-1056902 (**1**), 1056903 (**2**), 1056904 (**3**) contain the supplementary crystallographic data (excluding structure factors) for this paper. These data can be obtained free of charge from The Cambridge Crystallographic Data Centre via [ccdc.cam.ac.uk/getstructures](http://ccdc.cam.ac.uk/getstructures).

**Table S2.** Main crystallographic data and structure refinement details for complexes **1-3**.

|                                          | <b>1</b>                                                                                                   | <b>2</b>                                                                                                               | <b>3</b>                                                                                                                           |
|------------------------------------------|------------------------------------------------------------------------------------------------------------|------------------------------------------------------------------------------------------------------------------------|------------------------------------------------------------------------------------------------------------------------------------|
| Empirical formula                        | C <sub>40</sub> H <sub>80</sub> I <sub>5</sub> N <sub>2</sub> Nd <sub>3</sub> O <sub>10</sub> S<br>4, 2THF | C <sub>40</sub> H <sub>80</sub> I <sub>5</sub> N <sub>2</sub> Dy <sub>3</sub> O <sub>10</sub><br>S <sub>4</sub> , 2THF | C <sub>39.54</sub> H <sub>80.77</sub> I <sub>5</sub> N <sub>2.57</sub> N<br>d <sub>3</sub> O <sub>9.44</sub> S <sub>4</sub> , 2THF |
| Formula weight                           | 2088.72                                                                                                    | 2143.50                                                                                                                | 2082.82                                                                                                                            |
| <i>T</i> , K                             | 100                                                                                                        |                                                                                                                        |                                                                                                                                    |
| Wavelength, Å                            | 0.71073                                                                                                    |                                                                                                                        |                                                                                                                                    |
| Crystal system                           | Monoclinic                                                                                                 |                                                                                                                        | Orthorhombic                                                                                                                       |
| Space group                              | <i>P2(1)</i>                                                                                               |                                                                                                                        | <i>P2(1)2(1)2(1)</i>                                                                                                               |
| <i>a</i> , Å                             | 12.393(1)                                                                                                  | 12.418(1)                                                                                                              | 12.5369(2)                                                                                                                         |
| <i>b</i> , Å                             | 43.389(5)                                                                                                  | 43.476(5)                                                                                                              | 12.7379(2)                                                                                                                         |
| <i>c</i> , Å                             | 12.684(1)                                                                                                  | 12.707(2)                                                                                                              | 43.8743(7)                                                                                                                         |
| $\alpha$ , °                             | 90                                                                                                         | 90                                                                                                                     | 90                                                                                                                                 |
| $\beta$ , °                              | 90.013(2)                                                                                                  | 90.030(2)                                                                                                              | 90                                                                                                                                 |
| $\gamma$ , °                             | 90                                                                                                         | 90                                                                                                                     | 90                                                                                                                                 |
| Volume, Å <sup>3</sup>                   | 6820(1)                                                                                                    | 6860(1)                                                                                                                | 7006.5(2)                                                                                                                          |
| <i>Z</i>                                 | 4                                                                                                          | 4                                                                                                                      | 4                                                                                                                                  |
| $\rho_{calc}$ , Mg/m <sup>3</sup>        | 2.034                                                                                                      | 2.075                                                                                                                  | 1.975                                                                                                                              |
| Absorption coefficient, mm <sup>-1</sup> | 4.687                                                                                                      | 5.657                                                                                                                  | 4.562                                                                                                                              |
| F(000)                                   | 4012                                                                                                       | 4084                                                                                                                   | 4002                                                                                                                               |
| Crystal size, mm                         | 0.18 × 0.09 × 0.04                                                                                         | 0.12 × 0.10 × 0.10                                                                                                     | 0.40 × 0.40 × 0.40                                                                                                                 |
| $\theta$ range for data collection, °    | 2.47—29.00                                                                                                 | 2.34—27.00                                                                                                             | 2.94—26.00                                                                                                                         |
| Index ranges                             | -16 ≤ <i>h</i> ≤ 16<br>-59 ≤ <i>k</i> ≤ 58<br>-17 ≤ <i>l</i> ≤ 17                                          | -15 ≤ <i>h</i> ≤ 15<br>-55 ≤ <i>k</i> ≤ 55<br>-16 ≤ <i>l</i> ≤ 16                                                      | -15 ≤ <i>h</i> ≤ 15<br>-15 ≤ <i>k</i> ≤ 15<br>-54 ≤ <i>l</i> ≤ 54                                                                  |
| Reflections collected                    | 75809                                                                                                      | 68257                                                                                                                  | 104407                                                                                                                             |
| Independent reflections                  | 35242                                                                                                      | 29695                                                                                                                  | 13746                                                                                                                              |
| <i>R</i> <sub>int</sub>                  | 0.0585                                                                                                     | 0.0348                                                                                                                 | 0.0866                                                                                                                             |

|                                               |                |                |                |
|-----------------------------------------------|----------------|----------------|----------------|
| Completeness to $\theta$ , %                  | 99.9           | 99.8           | 99.8           |
| Goodness-of-fit on $F^2$                      | 1.009          | 1.085          | 1.188          |
| Final $R_1$ indices ( $I > 2\sigma(I)$ )      | 0.0450         | 0.0340         | 0.0540         |
| $R_2$ indices (All Data)                      | 0.0671         | 0.0851         | 0.1118         |
| Largest diff. peak and hole, $e/\text{\AA}^3$ | 1.478 / -1.199 | 1.853 / -1.600 | 1.582 / -1.395 |

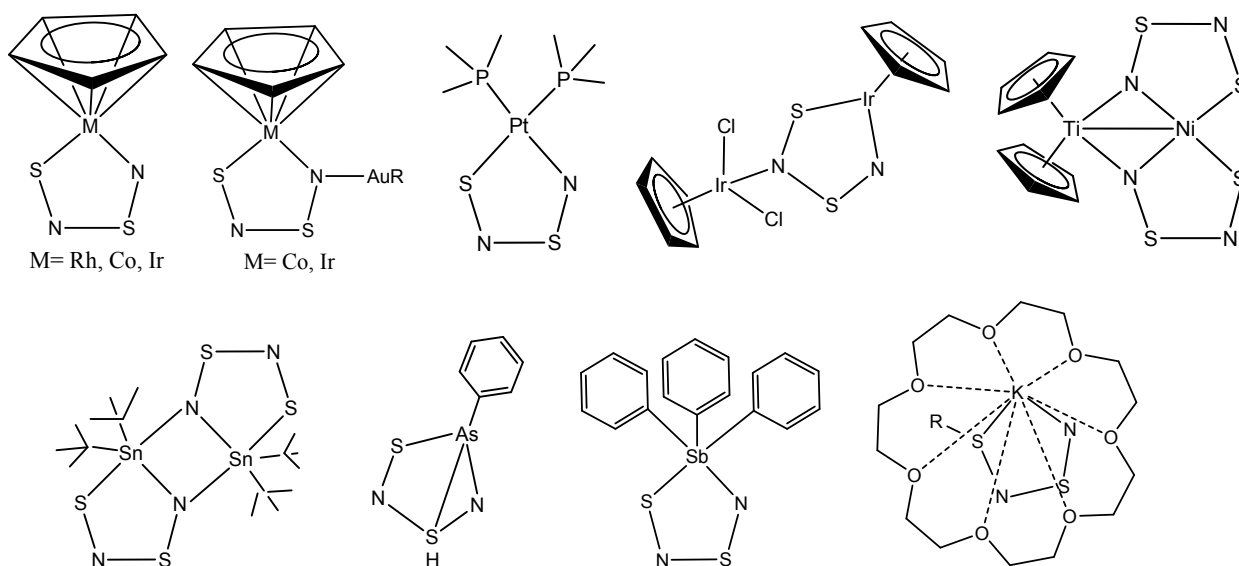

**Fig. S5.** Types of known complexes with  $S_2N_2$  ligands.

### Computed molecular structures and calculations details

To calculate the structure (Fig. S6) and energy of **1**, **2** and **3** nonempirical PBE density functional method<sup>[11]</sup> was used. All calculations were performed using the PRIRODA program package<sup>[12,13]</sup> in scalar-relativistic approximation, which is based on the full four-component one-electron Dirac equation with spin-orbit effects separated out<sup>[14]</sup>. This leads to four-component one-electron wave functions. The energy-optimized extended Gaussian basis set of double-polarized quality for large components, and the corresponding kinetically balanced basis for small components was used: Ln (30s,29p,20d,14f,6g)/[9s,8p,6d,3f,1g] S (15s,11p,3d)/[4s,3p,1d], C,N,O (10s,7p,3d)/[3s,2p,1d], and H (6s,2p)/[2s,1p]. This basis is compatible with recently proposed basis Ln (23s,16p,12d,6f)/[18s,12p,9d,3f]<sup>[15]</sup> for scalar relativistic calculation of

lanthanide complexes. The calculations were carried out at the Joint Supercomputer Center of Russian Academy of Sciences, Moscow, Russia.

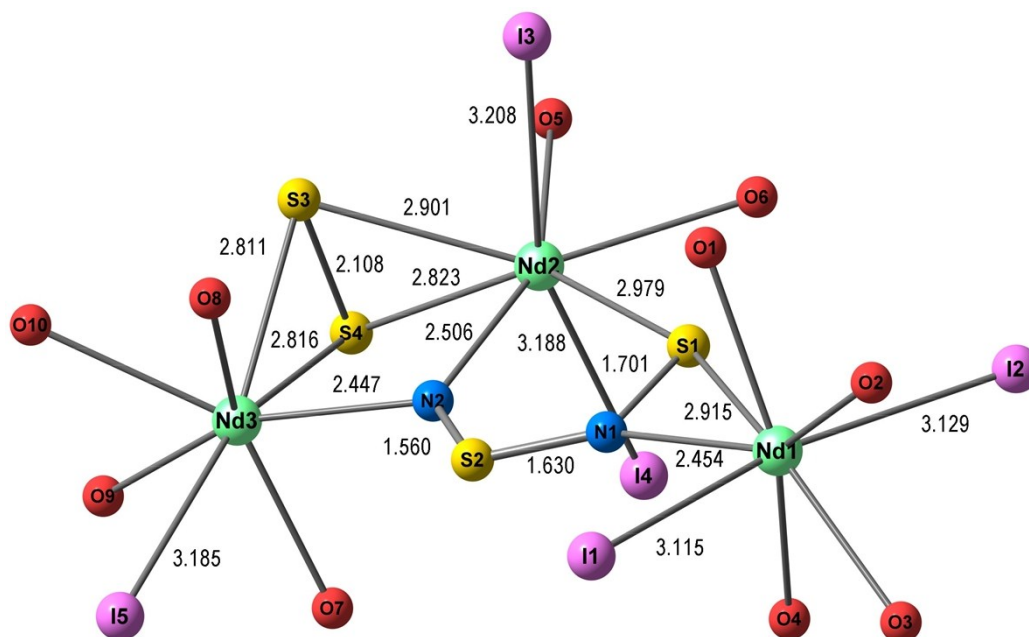

**Fig. S6** Calculated molecular structure and bond lengths in  $\text{Nd}_3\text{I}_5(\text{S}_2\text{N}_2)(\text{S}_2)(\text{THF})_{10}$  (**1**).

**Table S3.** The charge (q) and spin density (s) on the selected atoms in the complexes **1**, **2** and **3**.

| atom  | <b>1</b> |        | <b>2</b> |       | <b>3</b> |        |
|-------|----------|--------|----------|-------|----------|--------|
|       | q        | s      | q        | s     | q        | s      |
| Ln(1) | 0.208    | 3.116  | 0.268    | 4.779 | 0.209    | 3.115  |
| I(1)  | -0.336   | -0.034 | -0.339   | 0.034 | -0.334   | -0.035 |
| I(2)  | -0.331   | -0.033 | -0.337   | 0.035 | -0.330   | -0.033 |
| Ln(2) | 0.142    | 3.100  | 0.204    | 4.854 | 0.141    | 3.096  |
| I(3)  | -0.347   | -0.024 | -0.333   | 0.053 | -0.341   | -0.028 |
| I(4)  | -0.335   | -0.032 | -0.329   | 0.061 | -0.329   | -0.024 |
| Ln(3) | 0.212    | 3.107  | 0.266    | 4.814 | 0.204    | 3.104  |
| I(5)  | -0.344   | -0.018 | -0.339   | 0.021 | -0.339   | -0.020 |
| S(1)  | -0.030   | -0.034 | -0.040   | 0.059 | -0.031   | -0.029 |
| N(1)  | -0.127   | -0.013 | -0.128   | 0.031 | -0.127   | -0.008 |
| S(2)  | 0.255    | 0.004  | 0.248    | 0.001 | 0.248    | 0.003  |
| N(2)  | -0.240   | -0.018 | -0.247   | 0.014 | -0.241   | -0.021 |
| S(4)  | -0.142   | -0.058 | -0.140   | 0.095 | -0.139   | -0.055 |

|      |        |        |        |       |        |        |
|------|--------|--------|--------|-------|--------|--------|
| S(3) | -0.137 | -0.054 | -0.141 | 0.087 | -0.140 | -0.053 |
|------|--------|--------|--------|-------|--------|--------|

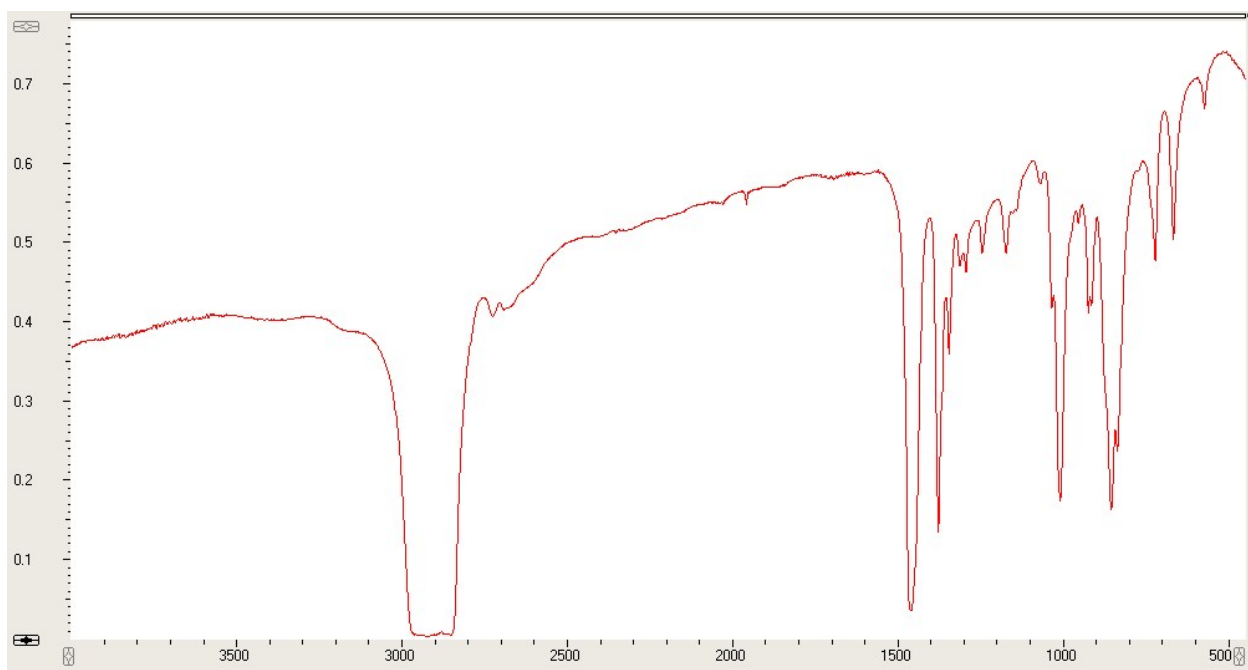

**Fig. S7a.** IR spectra of **1** (Nujol mulls).

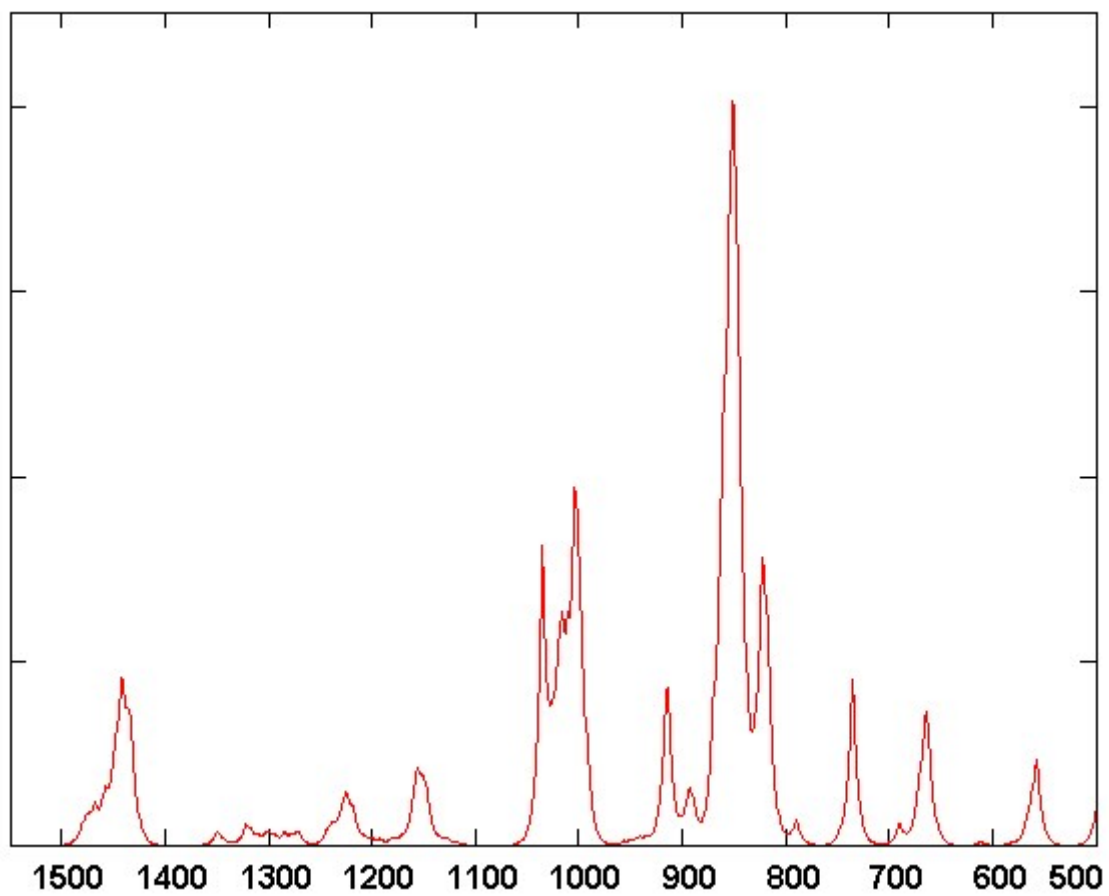

**Fig. S7b.** Calculated IR spectra of **1**.



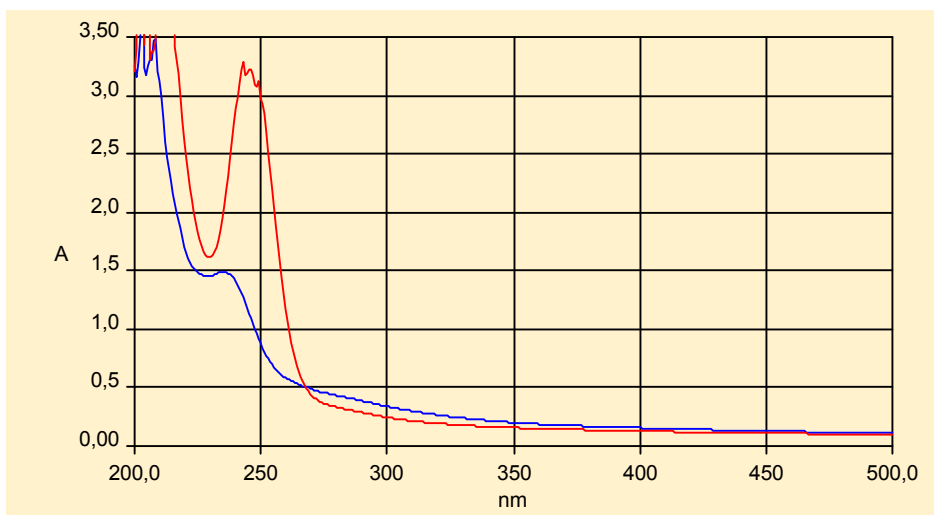

**Fig. S8** Absorption spectra of **1** (red) and **2** (blue) in acetonitrile solution.

## References

1. V. Matuska, et al. *Eur. J. Inorg. Chem.*, 2009, 4483—4490.
2. P. G. Waddell, A. M. Z. Slawin, N. Sieffert, M. Bühl and J. D. Woollins, *Eur. J. Inorg. Chem.*, 2010, 3185—3194.
3. A. M. Z. Slawin, P. G. Waddell and J. D. Woollins, *Acta Cryst.*, 2010, **E66**, M418.
4. Y. Li, et al. *Organometallics*, 2005, **24**, 1982-1988.
5. E. C. Brown, et al. *Inorg. Chem.* 2004, **43**, 3335—3337.
6. G. M. Sheldrick, SHELXTL v.6.12: Structure Determination Software Suite. *Bruker AXS, Madison, WI*, 2000.
7. G. M. Sheldrick, *Acta Cryst.*, 2008, **A64**, 112-122.
8. CrysAlis Pro, *Agilent Technologies Ltd*, Yarnton, England, 2011.
9. A. L. Spek, *Acta Cryst.*, 2009, **D65**, 148-155.
10. Sheldrick, G.M. SADABS v.2.01. Bruker/Siemens Area Detector Absorption Correction Program; *Bruker AXS, Madison, WI*, 1998.
11. J. P. Perdew, K. Burke and M. Ernzerhof, *Rev. Lett.*, 1996, **77**, 3865-3868.
12. D. N. Laikov, *Chem. Phys. Lett.*, 1997, **281**, 151-156.
13. D. N. Laikov, *Chem. Phys. Lett.*, 2005, **416**, 116-120.
14. K. G. Dyall, *J. Chem. Phys.*, 1994, **100**, 2118 - 2127.
15. D. A. Pantazis and F. Neese, *J. Chem. Theor. Comput.*, 2009, **5**, 2229 - 2238.
